# Supplementary material for: Activation of the PPARγ/NF-κB pathway by A-MPDA@Fe3O4@PVP via scavenging reactive oxygen species to alleviate hepatic ischemia-reperfusion injury
Source: Royal Society of Chemistry journal article supplement (doi:10.1039/d4tb00423j), 2024-01-01
Supplement: d4tb00423j1.pdf [file d4tb00423j1.pdf]

## Supporting Information

### Activation of the PPAR $\gamma$ /NF- $\kappa$ B pathway by A-MPDA@Fe<sub>3</sub>O<sub>4</sub>@PVP via scavenging reactive oxygen species to alleviate hepatic ischemia-reperfusion injury

Dong Mo,<sup>af</sup> Wei Cui,<sup>a</sup> Linxin Chen,<sup>a</sup> Juanjuan Meng,<sup>a</sup> Yuting Sun,<sup>g</sup> Kaiyong Cai,<sup>d</sup> Jixi Zhang,<sup>\*d</sup> Jianrong Zhang,<sup>\*c</sup> Kui Wang <sup>\*de</sup>, and Xiaohe Luo <sup>\*ab</sup>

<sup>a</sup> Department of Central Laboratory, Chongqing University Three Gorges Hospital, School of Medicine, Chongqing University, Chongqing, 40400, China.

<sup>b</sup> Department of Laboratory Medicine, Chongqing University Three Gorges Hospital, School of Medicine, Chongqing University, Chongqing, 40400, China.

<sup>c</sup> Department of Cardiovascular Surgery, Chongqing University Three Gorges Hospital, School of Medicine, Chongqing University, Chongqing, 40400, China.

<sup>d</sup> Key Laboratory of Biorheological Science and Technology, Ministry of Education, College of Bioengineering, Chongqing University, No. 174 Shazheng Road, Chongqing 400044, China.

<sup>e</sup> Department of Pharmacy, The Second Affiliated Hospital of Army Medical University, Chongqing 400037, China.

<sup>f</sup> State Key Laboratory of Biotherapy and Cancer Center, West China Hospital, West China Medical School, Sichuan University, Collaborative Innovation Center of Biotherapy, Chengdu, 610041, China.

<sup>g</sup> College of Biosystems Engineering and Food Science, Zhejiang University, Hangzhou, 310058, China.

\* Corresponding authors:

E-mail: jixizhang@cqu.edu.cn (J. Zhang)

E-mail: jianrongzhang@cqu.edu.cn (J. Zhang);

E-mail: kuiwang@cqu.edu.cn (K. Wang);

E-mail: xiaoheluo@cqu.edu.cn (X. Luo).

## Characterization

Transmission electron microscopy (TEM) images were performed on a JEM 2010 (JEOL, Japan) instrument at 200 kV acceleration to investigate the size, morphology and integrity of NPs. Samples were dried on carbon-coated Cu grids before characterization. The bulk and surface chemical compositions of samples were analyzed with high-angle annular dark-field imaging, scanning transmission electron microscopy (HAADF-STEM) and elemental mapping images using a JEM-6700F instrument (JEOL, Japan). Powder X-ray diffraction (XRD) measurements were obtained using a Bruker D8 (Germany) Advance X-Ray powder diffractometer (40 kV, 40 mA, CuK $\alpha$ 1 radiation of  $\lambda = 1.54059 \text{ \AA}$ ) with a scan speed of  $2^\circ/\text{min}$  and a step size of  $0.02^\circ$ . Nitrogen sorption isotherms were measured through an ASAP 2010 analyzer (Micrometrics, USA). XPS analysis was determined using an Axis Ultra spectrometer (Kratos, UK) with Al K $\alpha$  excitation radiation at ca.  $5 \times 10^{-9} \text{ Pa}$ . Fourier transform infrared (FTIR) spectra were recorded on a Spectrum 100 infrared spectrophotometer (PerkinElmer, USA) at a test range of  $400\text{-}4,000 \text{ cm}^{-1}$  with KBr pellet. UV-vis absorption was recorded on a UV-Vis spectrofluorometer (NanoDrop One, Thermo). Fluorescence spectra were recorded on a fluorescence spectrophotometer (RF-6000, Shimadzu, Japan) using a xenon lamp as an excitation source.

**Table S1** the antibodies used in the present study.

| <b>Antibody name</b>      | <b>Dilution ratio</b> | <b>kD</b> | <b>Source</b> | <b>Brand</b>                       | <b>Catalog No.</b> |
|---------------------------|-----------------------|-----------|---------------|------------------------------------|--------------------|
| $\beta$ -actin            | 1:1000                | 41.6      | Mouse         | ZSGB-BIO                           | TA-09              |
| Caspase-3                 | 1:1000                | 35/19/17  | Rabbit        | Cell Signaling Technology          | 14220              |
| Bax                       | 1:500                 | 23        | Mouse         | SANTA CRUZ BIOTECHNOLOGY           | sc-7480            |
| Bcl-2                     | 1:1000                | 26        | Rabbit        | abcam                              | ab59348            |
| TNF- $\alpha$             | 1:500                 | 17/26     | Mouse         | SANTA CRUZ BIOTECHNOLOGY           | sc-52746           |
| IL-6                      | 1:500                 | 21        | Mouse         | SANTA CRUZ BIOTECHNOLOGY           | sc-32296           |
| IL-1 $\beta$              | 1:1000                | 31        | Mouse         | Cell Signaling Technology          | 12242S             |
| PPAR $\gamma$             | 1:1000                | 57        | Rabbit        | Cell Signaling Technology          | 2435S              |
| NF- $\kappa$ B            | 1:1000                | 61        | Rabbit        | BEIJING BIOSYNTHESIS BIOTECHNOLOGY | bs-0465R           |
| p-NF- $\kappa$ B          | 1:1000                | 65        | Rabbit        | Cell Signaling Technology          | 3033S              |
| I- $\kappa$ B- $\alpha$   | 1:1000                | 39        | Rabbit        | Cell Signaling Technology          | 4812S              |
| p-I- $\kappa$ B- $\alpha$ | 1:1000                | 40        | Mouse         | Cell Signaling Technology          | 9246S              |
| F4/80                     | 1:1000                | 65-250    | Rabbit        | Cell Signaling Technology          | 70076S             |

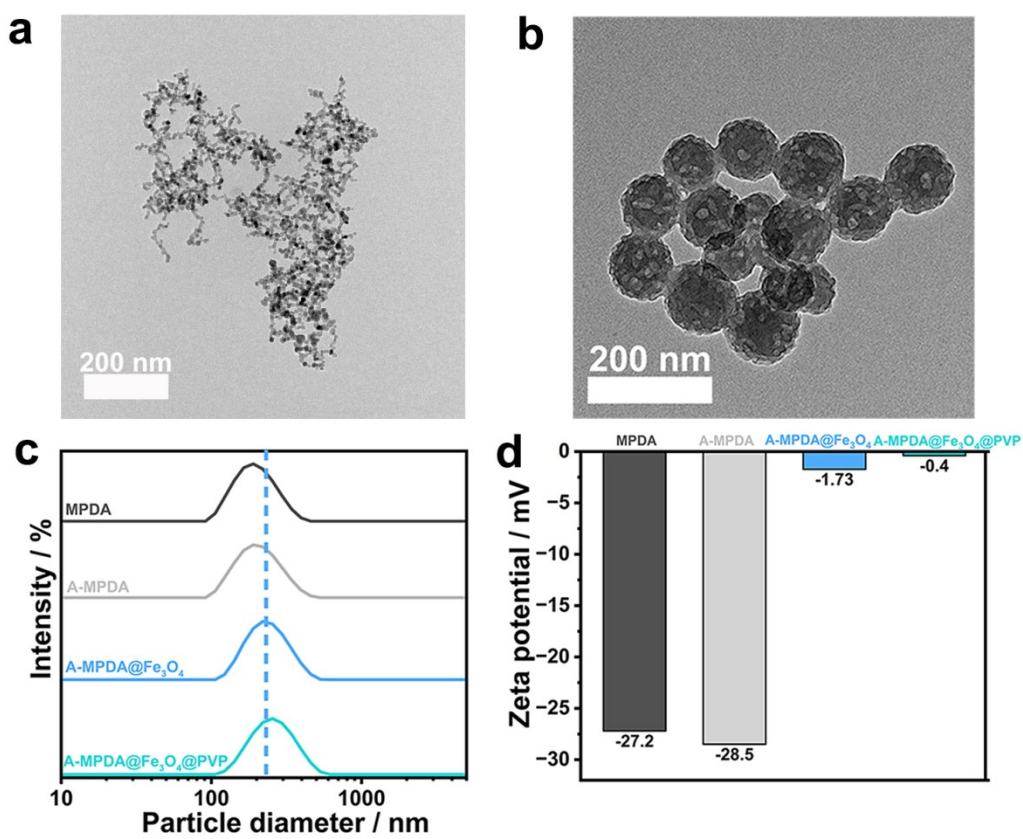

**Fig. S1.** TEM image of  $\text{Fe}_3\text{O}_4$  (a) and MPDA NPs (b), DLS size distribution (c) and Zeta potential (d) of MPDA, A-MPDA, A-MPDA@ $\text{Fe}_3\text{O}_4$ , and A-MPDA@ $\text{Fe}_3\text{O}_4$ @PVP NPs in water.

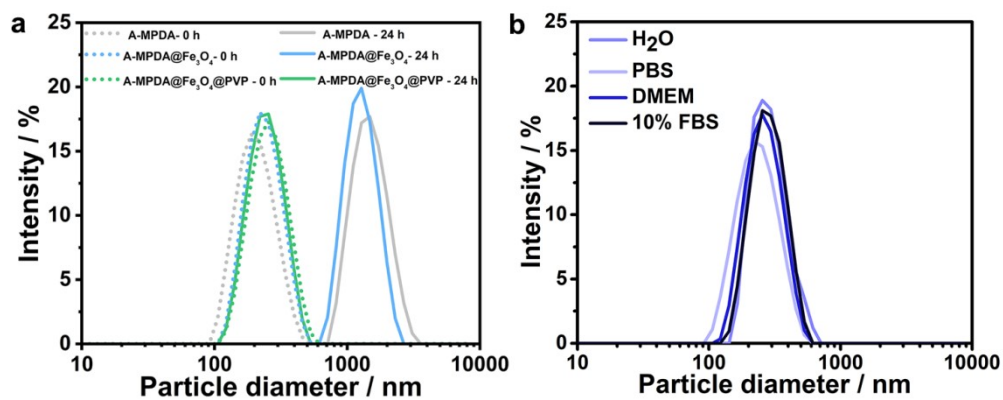

**Fig. S2.** (a) DLS size distribution of A-MPDA, A-MPDA@Fe<sub>3</sub>O<sub>4</sub> and A-MPDA@Fe<sub>3</sub>O<sub>4</sub>@PVP NPs in DMEM for 0 h and 24 h. (b) DLS size distribution of A-MPDA@Fe<sub>3</sub>O<sub>4</sub>@PVP NPs in different dispersing solvents for 24 h.

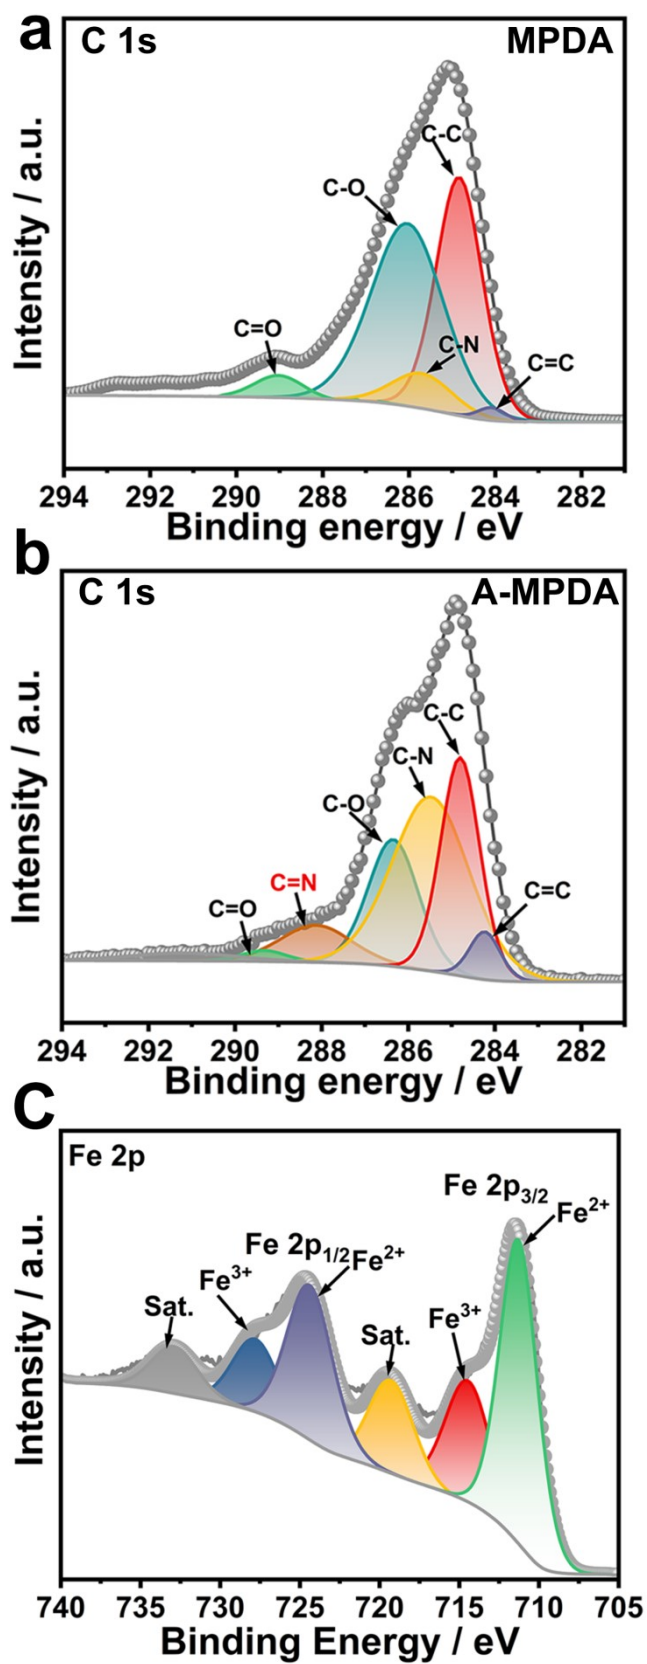

**Fig. S3.** High-resolution X-ray photoelectron spectra of C1s in MPDA (a) and A-MPDA NPs (b); (c) High-resolution XPS spectra of Fe 2p in A-MPDA@Fe<sub>3</sub>O<sub>4</sub>@PVP.

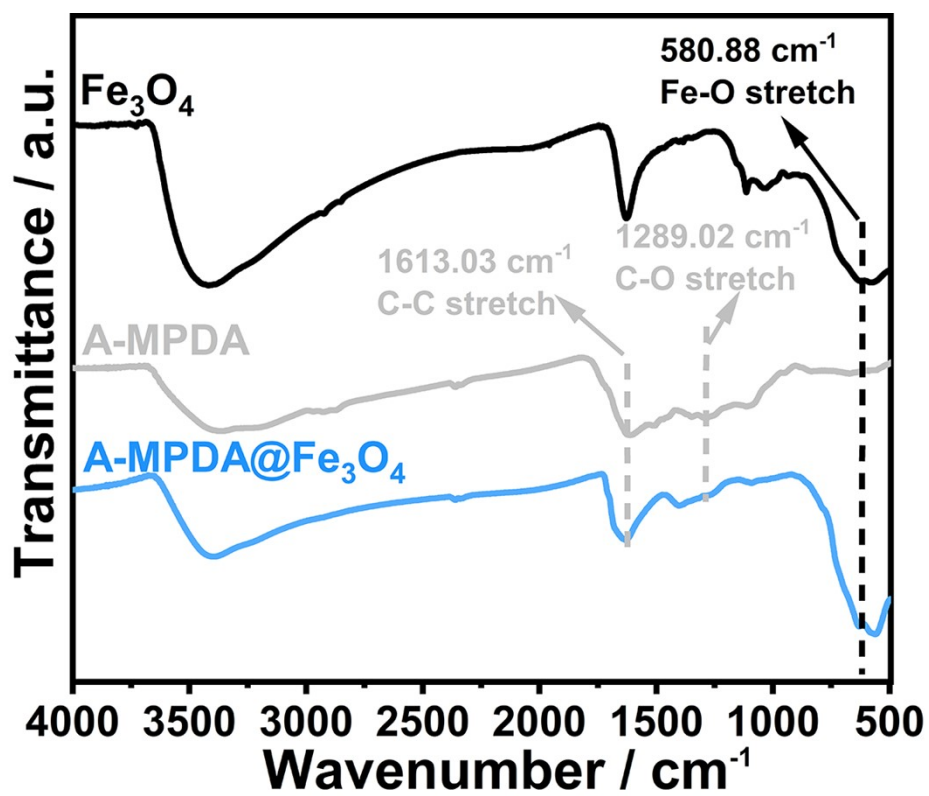

**Fig. S4.** Fourier transform infrared spectroscopy (FT-IR) of Fe<sub>3</sub>O<sub>4</sub>, A-MPDA, and A-MPDA@Fe<sub>3</sub>O<sub>4</sub> NPs.

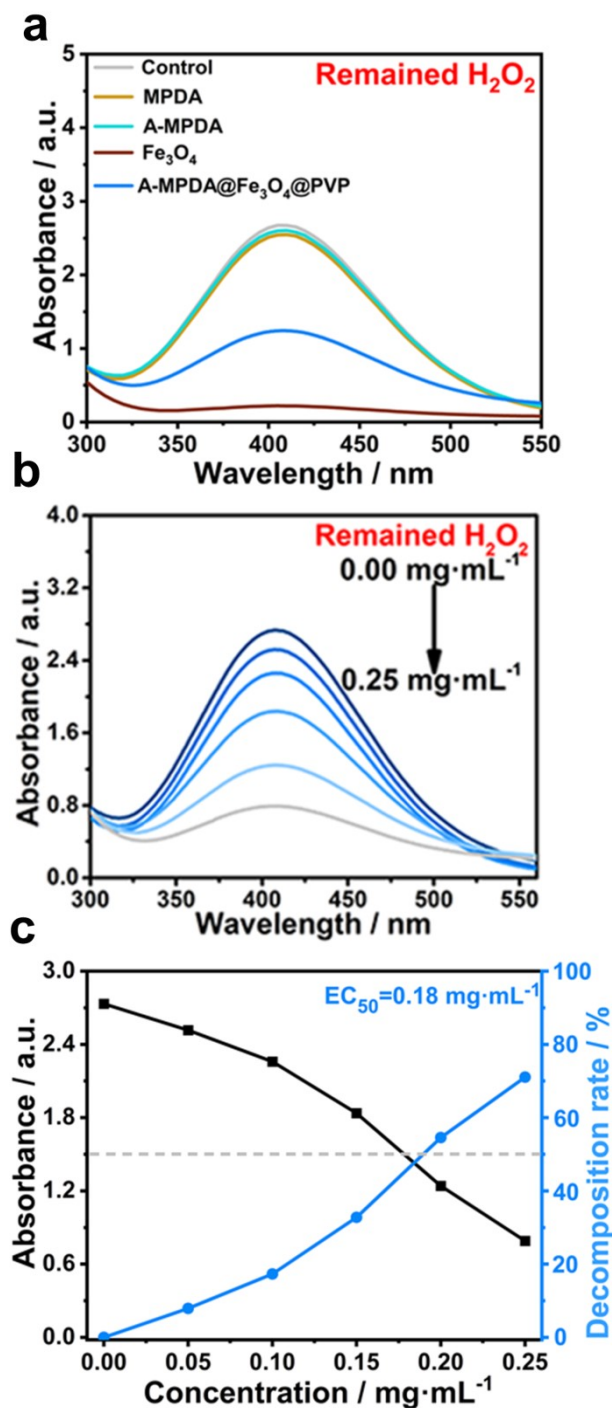

**Fig. S5.** (a) scavenging efficiencies of H<sub>2</sub>O<sub>2</sub> with MPDA, A-MPDA, Fe<sub>3</sub>O<sub>4</sub> and A-MPDA@Fe<sub>3</sub>O<sub>4</sub>@PVP NPs; (b) scavenging efficiencies of H<sub>2</sub>O<sub>2</sub> exposed to different concentrations of A-MPDA@Fe<sub>3</sub>O<sub>4</sub>@PVP NPs, respectively, and the corresponding absorbance of each system and decomposition rate of A-MPDA@Fe<sub>3</sub>O<sub>4</sub>@PVP NPs toward H<sub>2</sub>O<sub>2</sub> (c).



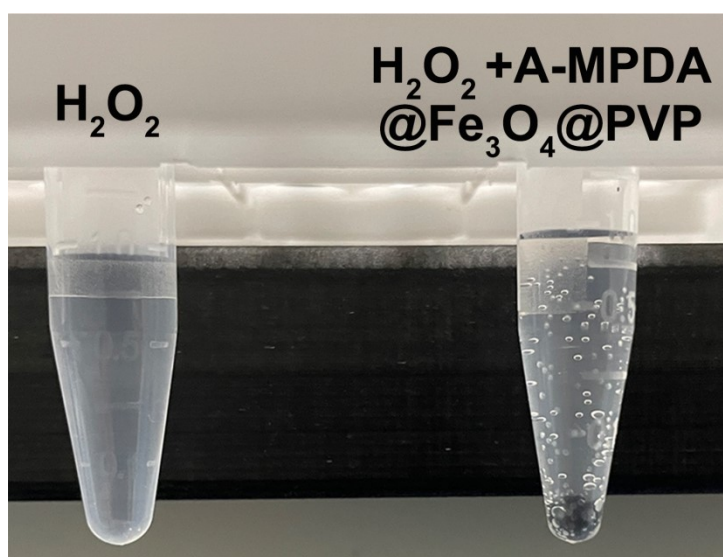

**Fig. S6.**  $O_2$  bubbles observation of A-MPDA@ $Fe_3O_4$ @PVP NPs ( $2 \text{ mg} \cdot \text{mL}^{-1}$ ) solution after addition of 200 mM  $H_2O_2$ .

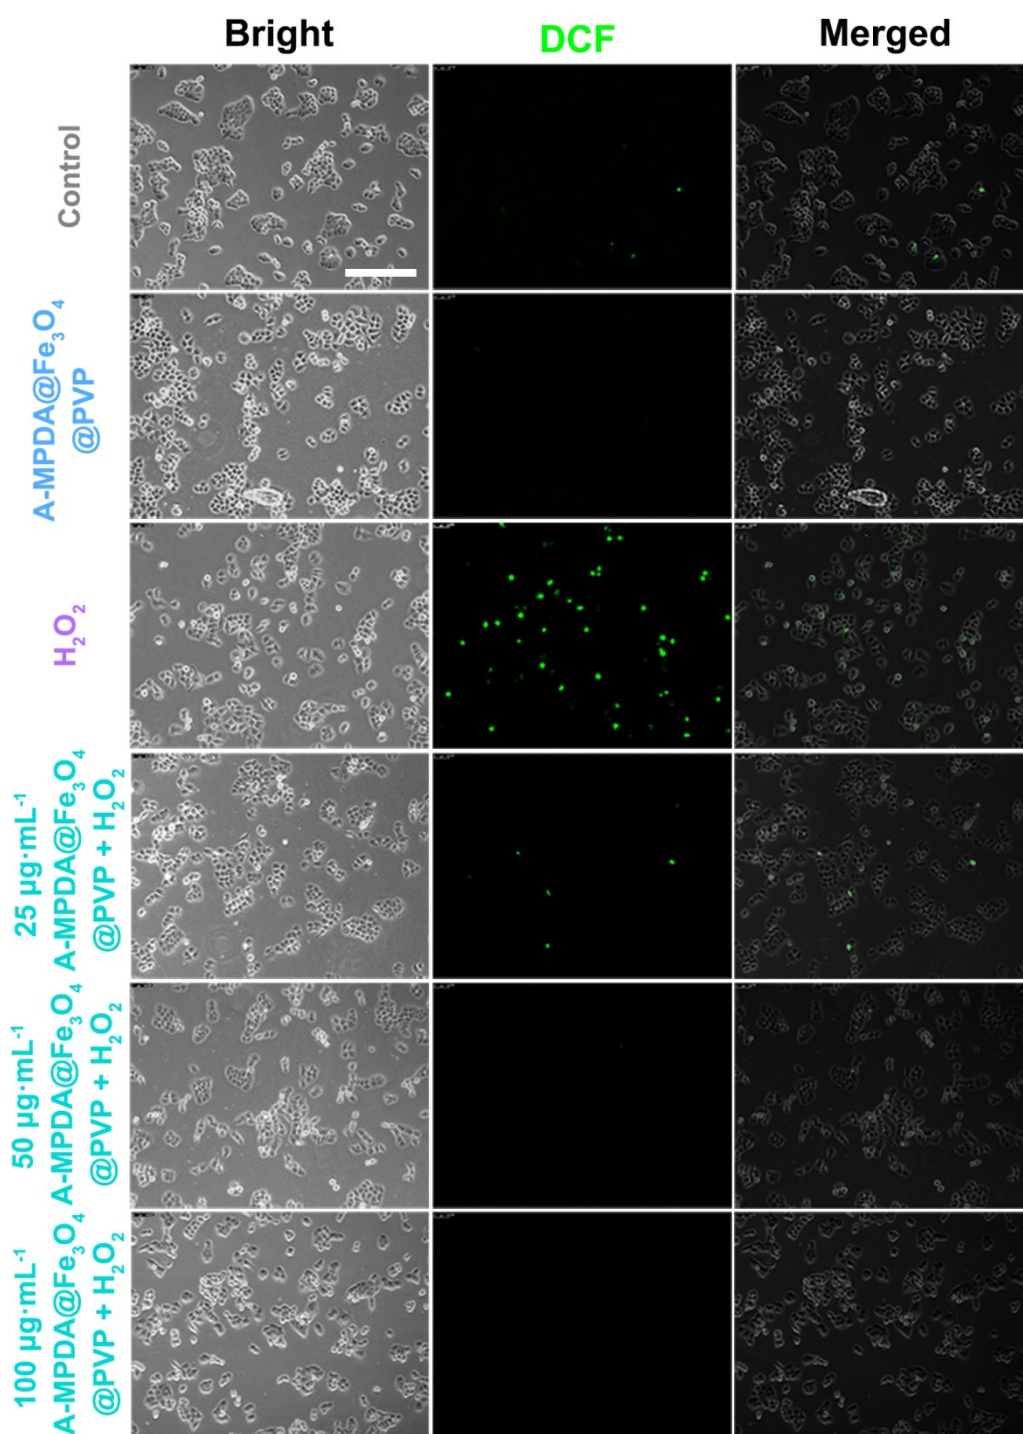

**Fig. S7.** Representative intracellular ROS staining of untreated and different concentration of A-MPDA@Fe<sub>3</sub>O<sub>4</sub>@PVP NPs-treated L02 cells with H<sub>2</sub>O<sub>2</sub> treatment (200 μM). Scale bar: 300 μm.

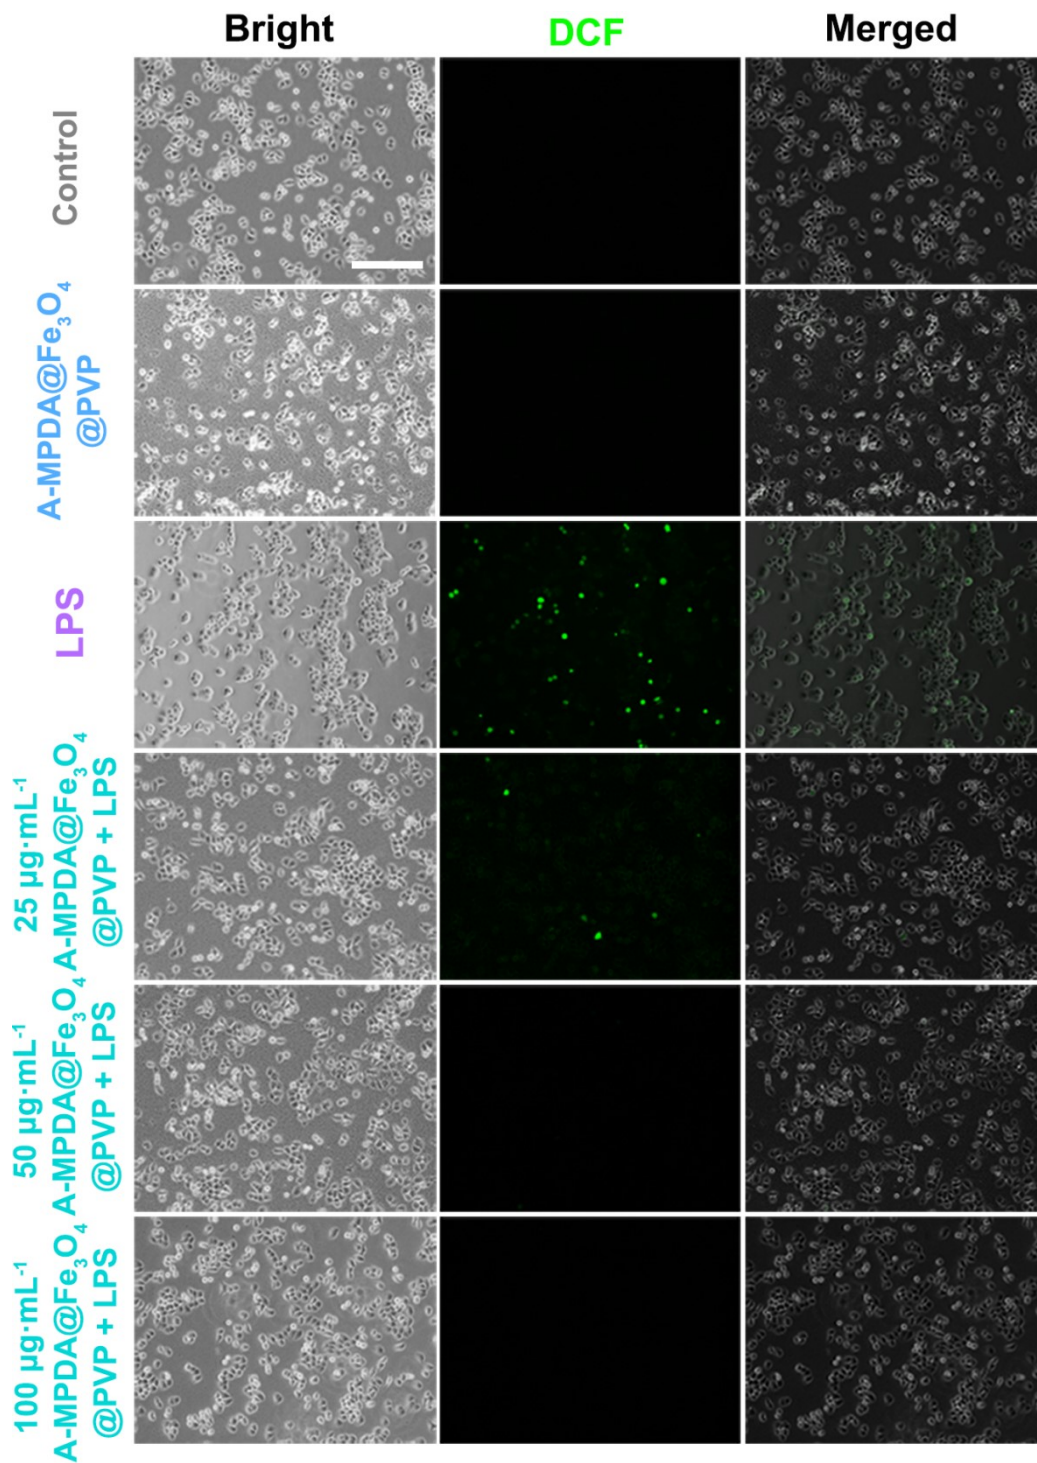

**Fig. S8.** Representative intracellular ROS staining of untreated and different concentration of A-MPDA@Fe<sub>3</sub>O<sub>4</sub>@PVP NPs-treated L02 cells with LPS treatment (20 μg·mL<sup>-1</sup>). Scale bar: 300 μm.

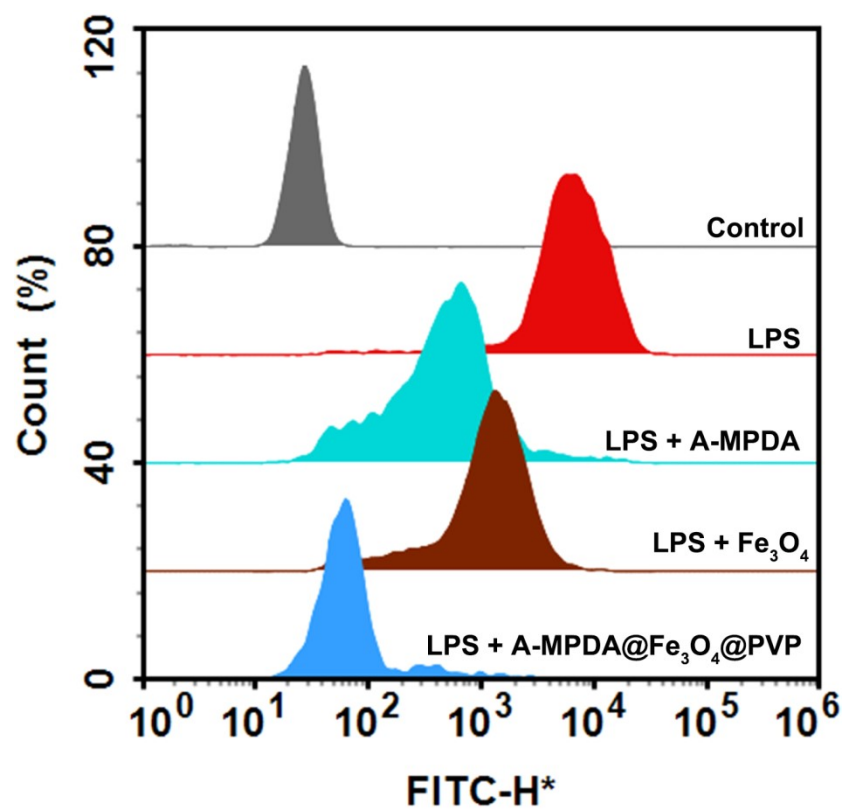

**Fig. S9.** Flow cytometry analysis of representative intracellular ROS staining of different nanoparticles -treated cells with LPS treatment.

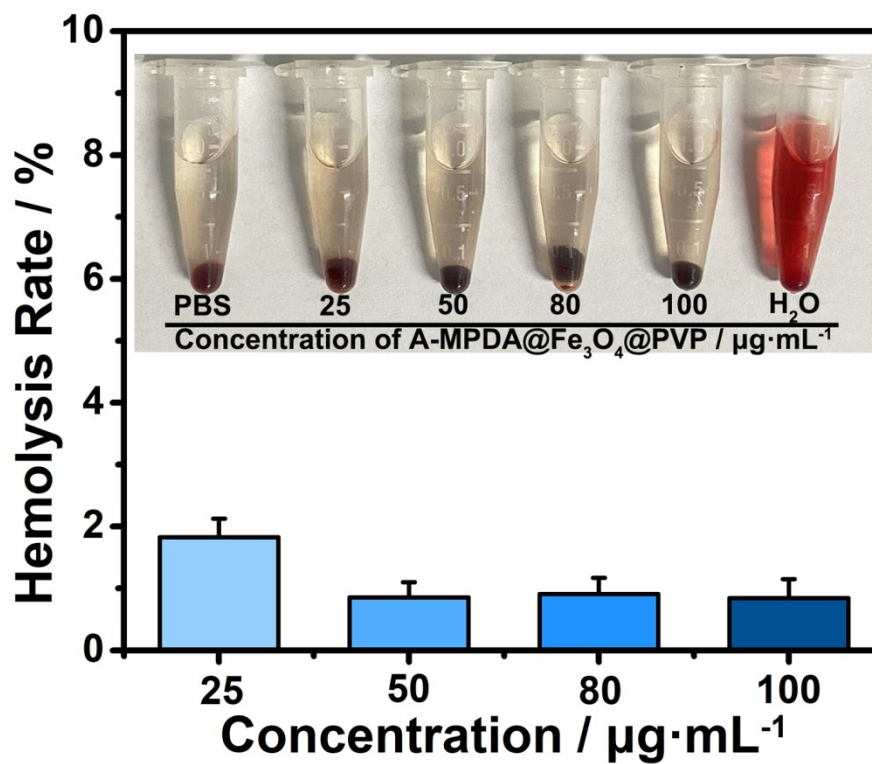

Fig. S10. Hemolytic assays of A-MPDA@Fe<sub>3</sub>O<sub>4</sub>@PVP NPs in different concentration.

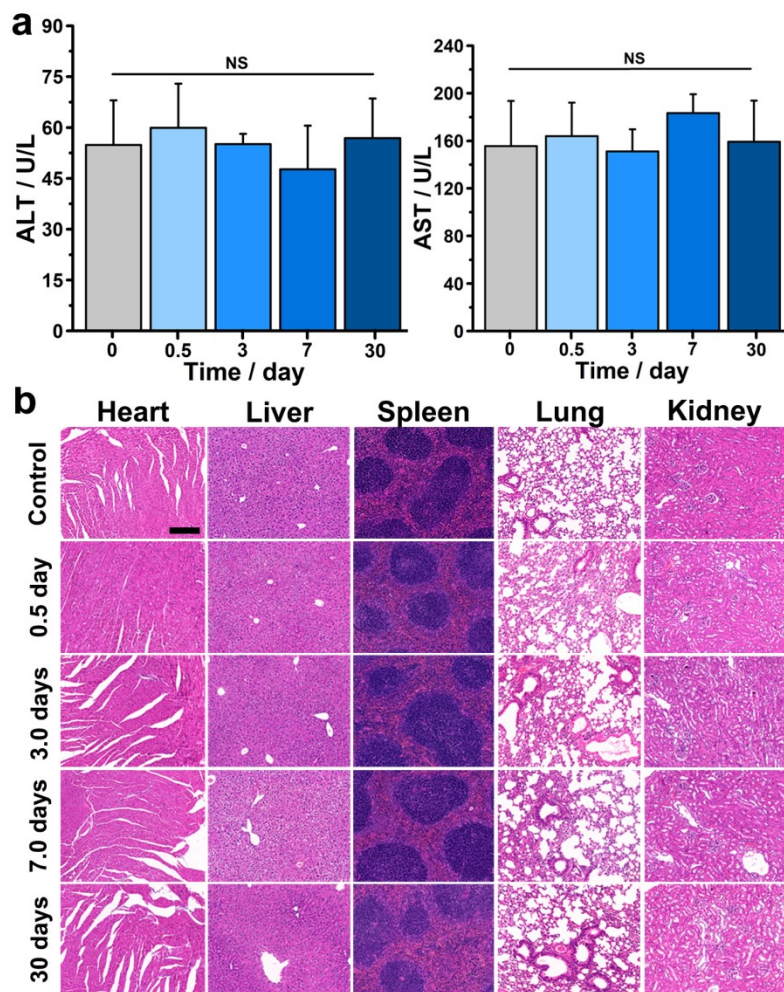

**Fig. S11** *In vivo* biocompatibility of A-MPDA@Fe<sub>3</sub>O<sub>4</sub>@PVP NPs. (a) Serum levels as part ALT, AST. *n*=5 per group; (b) Representative H&E staining images of the main organs at 0.5, 3, 7, and 30 days after intravenous injection of 5 mg·kg<sup>-1</sup> A-MPDA@Fe<sub>3</sub>O<sub>4</sub>@PVP NPs on healthy mice. Scale bar: 200 μm

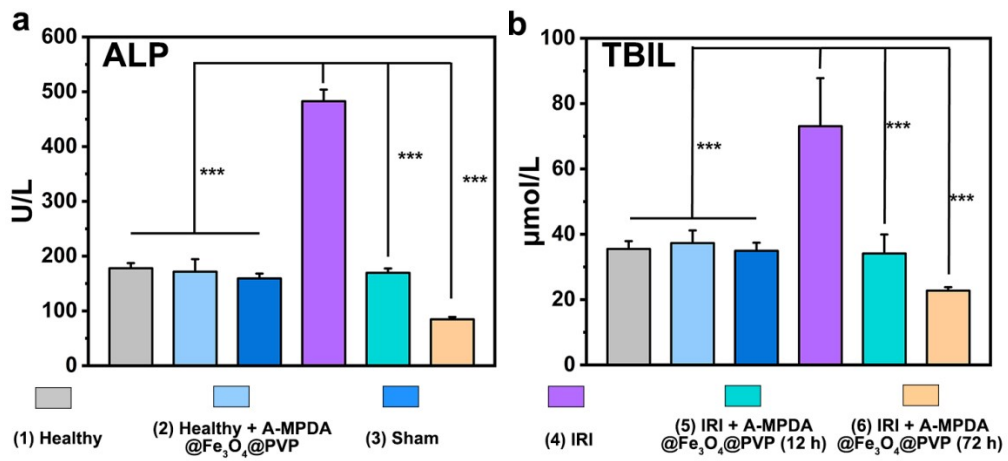

**Fig. S12.** Change in serum ALP a) and TBIL b) levels from various groups of mice (n = 4).
